# Supplementary material
Source: PubMed Central journal article supplement (PMC3564952)

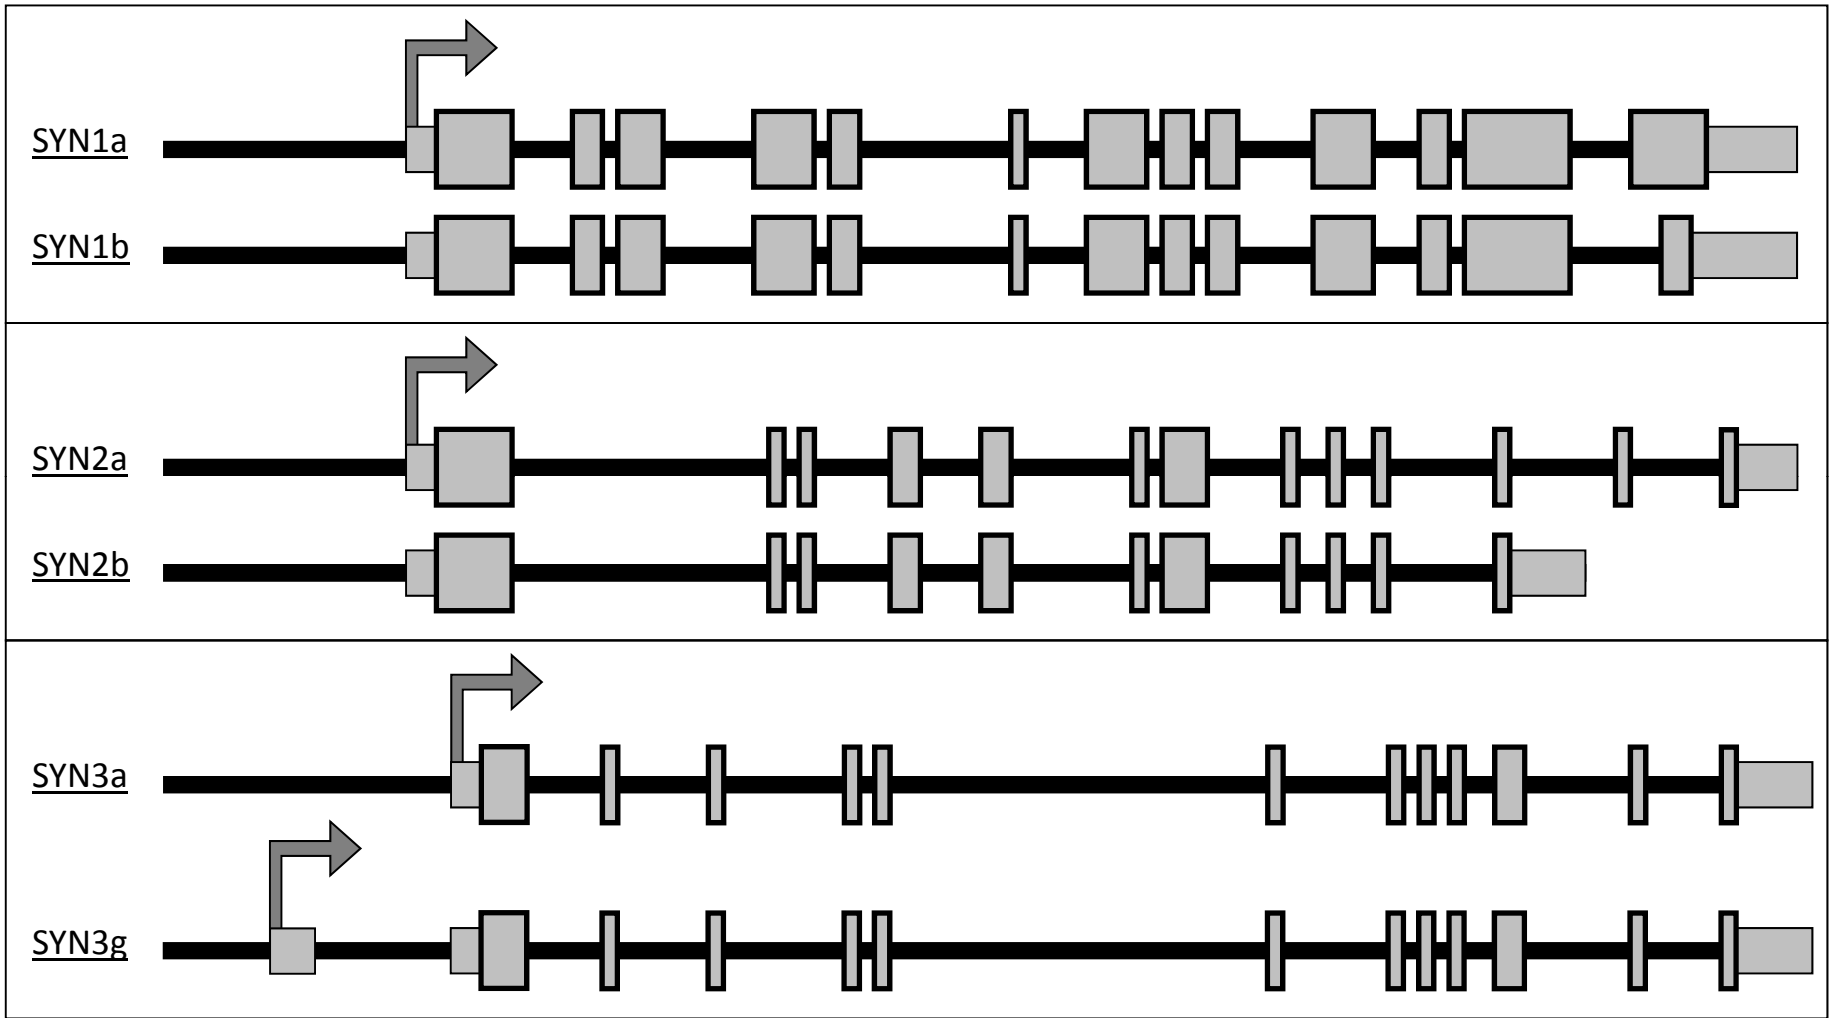

Supplement: NIHMS2669-supplement-Supp_2_ppt.pdf [file NIHMS2669-supplement-Supp_2_ppt.pdf]
